# Supplementary material for: Fermentation Mechanism Analysis of Reconstituted Tobacco Concentrate by Klebsiella variicola Using Macro-genomics Approaches
Source: Research Square preprint supplement (doi:10.21203/rs.3.rs-2590151/v1), 2023-02-22
Supplement: Supplementary file 2 [file 2933de731d70242b07111030.docx]

Supplementary table. 1. mass fraction of conventional chemical components of concentrated solution

| Sample | Water-soluble Total Sugar（%） | Total Alkaloids（%） | Potassium  （%） |
| --- | --- | --- | --- |
| 0 h | 6.83 | 1.34 | 3.63 |
| 8 h | 6.49 | 1.30 | 3.66 |
| 16 h | 5.25 | 1.27 | 3.64 |
| 24 h | 4.78 | 1.32 | 3.67 |
| 36 h | 4.37 | 1.33 | 3.80 |
