# Supplementary material for: Fermentation Mechanism Analysis of Reconstituted Tobacco Concentrate by Klebsiella variicola Using Macro-genomics Approaches
Source: Research Square preprint supplement (doi:10.21203/rs.3.rs-2590151/v1), 2023-02-22
Supplement: Supplementary file 3 [file 7120d25821fbce7f5f7d4491.docx]

Table 1. Neutral flavor components of concentrate

|  |  |  |  | concentration | | |  |
| --- | --- | --- | --- | --- | --- | --- | --- |
| Number | CAS No | Substance name | 0h | 8h | 16h | 24h | 36h |
| 3 | 100-42-5 | Styrene | 0.28 | 0.37 | 0.40 | 0.32 | 0.47 |
| 4 | 3857-25-8 | 5-Methyl-2-furanol | 0.03 | 0.02 | 0.02 | 0.03 | 0.02 |
| 5 | 100-52-7 | Benzaldehyde | 0.03 | 0.05 | 0.04 | 0.04 | 0.04 |
| 6 | 100-51-6 | Benzyl alcohol | 0.24 | 0.27 | 0.27 | 0.38 | 0.32 |
| 7 | 122-78-1 | Phenylacetaldehyde | 0.67 | 0.9 | 0.84 | 1.07 | 0.98 |
| 9 | 1072-83-9 | 2-Acetylpyrrole | 0.17 | 0.16 | 0.20 | 0.31 | 0.21 |
| 11 | 78-70-6 | Linalool | 0.08 | 0.09 | 0.09 | 0.12 | 0.10 |
| 12 | 60-12-8 | Phenylethanol | 0.19 | 0.21 | 0.19 | 0.28 | 0.21 |
| 13 | 1125-21-9 | 4-oxoisofolkone | 0.06 | 0.09 | 0.10 | 0.13 | 0.12 |
| 15 | 432-25-7 | β-Cyclocitral | 0.22 | 0.27 | 0.26 | 0.36 | 0.35 |
| 16 | 56797-40-1 | (Z) - 7-Cetylenal | 0.07 | 0.09 | 0.09 | 0.12 | 0.12 |
| 17 | 116-26-7 | Crocin aldehyde | 0.08 | 0.09 | 0.09 | 0.12 | 0.11 |
| 18 | 475-03-6 | 1,2,3,4-tetrahydro-1,1,6-trimethylnaphthalene | 0.09 | 0.09 | 0.08 | 0.25 | 0.23 |
| 20 | 54-11-5 | Nicotine | 0.08 | 0.08 | 0.06 | 0.06 | 0.06 |
| 21 | 21852-80-2 | 1,9-Heptadecadiene-4,6-diyn-3-ol | 0.06 | 0.06 | 0.06 | 0.13 | 0.16 |
| 22 | 23726-93-4 | β-Damastrone | 0.06 | 0.06 | 0.07 | 0.13 | 0.06 |
| 24 | 1883-13-2 | (±) - 3-hydroxylauric acid | - | - | 0.05 | - | - |
| 27 | 54868-48-3 | Solanone | 0.91 | 1.11 | 1.07 | 1.34 | 1.26 |
| 29 | 23726-93-4 | Damarone | 0.63 | 0.75 | 0.72 | 0.91 | 0.84 |
| 32 | 3796-70-1 | Geranyl acetone | 0.26 | 0.32 | 0.31 | 0.17 | 0.24 |
| 33 | 3879-26-3 | Neroli acetone | - | - | - | 0.07 | - |
| 36 | 96-76-4 | 2,4-di-tert-butylphenol | 0.04 | 0.05 | 0.05 | 0.09 | 0.52 |
| 37 | 17092-92-1 | Dihydrokiwi lactone | 0.42 | 0.34 | 0.33 | 0.58 | 1.23 |
| 38 | 38818-55-2 | Megalenone a | 0.18 | 0.20 | 0.17 | 0.28 | 0.39 |
| 39 | 38818-55-2 | Megalenone b | 1.03 | 1.03 | 0.98 | 1.24 | 1.09 |
| 41 | 38818-55-2 | Megalenone c | 0.82 | 0.96 | 0.91 | 1.13 | 0.99 |
| 42 | 34318-21-3 | Megalenone d | 0.18 | 0.19 | 0.25 | 0.34 | 0.28 |
| 49 | 473-08-5 | α-Cyperone | 0.28 | 0.33 | 0.37 | 0.43 | 0.40 |
| 50 | 102608-53-7 | Phytol | 1.67 | 1.99 | 1.93 | 2.47 | 2.50 |
| 51 | 502-69-2 | Phytone | 0.43 | 0.50 | 0.48 | 0.64 | 0.61 |
| 52 | 65646-68-6 | 4-hydroxyphenyl retinamide | 0.36 | 0.38 | 0.34 | 0.94 | 0.37 |
| 53 | 25360-09-2 | potassium,2,6-ditert-butylphenolate | 0.05 | - | 0.05 | 0.08 | - |
| 54 | 1117-52-8 | farnesyl acetone | 0.87 | 0.92 | 0.97 | 1.27 | 1.06 |
| 55 | 112-39-0 | Methyl hexadecanoate | 1.05 | 1.13 | 1.15 | 1.52 | 1.31 |
| 56 | 68-26-8 | Vitamin a | 0.89 | 0.9 | 0.85 | 0.55 | 0.47 |
| 57 | 1898-13-1 | CEMBRENE | 0.25 | 0.24 | 0.23 | 0.21 | 0.20 |
| 58 | 84-74-2 | dibutyl phthalate | 0.29 | 0.31 | 0.42 | 0.65 | 0.54 |

Note: "-" means not detected. Three parallel groups were set for each group of samples.
