# Supplementary material for: Fermentation Mechanism Analysis of Reconstituted Tobacco Concentrate by Klebsiella variicola Using Macro-genomics Approaches
Source: Research Square preprint supplement (doi:10.21203/rs.3.rs-2590151/v1), 2023-02-22
Supplement: Supplementary file 4 [file ce7498d721a42feab53501c4.docx]

Supplementary table 2. CAZy gene cluster annotation results

| Type | Family | Gene cluster | Associated protein |
| --- | --- | --- | --- |
|  |  | CE1 | acetyl xylan esterase (EC 3.1.1.72) |
|  |  | CE10 | arylesterase (EC 3.1.1.-) |
|  |  | CE11 | UDP-3-0-acyl N-acetylglucosamine deacetylase (EC 3.5.1.-). |
|  | CE | CE14 | N-acetyl-1-D-myo-inosityl-2-amino-2-deoxy-alpHa-D-  glucopyranoside deacetylase (EC 3.5.1.89) |
|  |  | CE3 | acetyl xylan esterase (EC 3.1.1.72). |
| chr |  | CE7 | acetyl xylan esterase (EC 3.1.1.72) |
|  |  | CE8 | pectin methylesterase (EC 3.1.1.11). |
|  |  | CE9 | N-acetylglucosamine 6-pHospHate deacetylase (EC 3.5.1.25) |
|  |  | GH1 | beta-glucosidase (EC 3.2.1.21) |
|  |  | GH102 | peptidoglycan lytic transglycosylase (EC 3.2.1.-) |
|  | GH | GH103 | peptidoglycan lytic transglycosylase (EC 3.2.1.-) |
|  |  | GH105 | unsaturated rhamnogalacturonyl hydrolase (EC 3.2.1.-) |
|  |  | GH109 | alpHa-N-acetylgalactosaminidase (EC 3.2.1.49) |
|  |  | GH13 | alpHa-amylase (EC 3.2.1.1) |
|  |  | GH18 | chitinase (EC 3.2.1.14) |
|  |  | GH19 | chitinase (EC 3.2.1.14). |
|  |  | GH2 | beta-galactosidase (EC 3.2.1.23) |
|  |  | GH23 | lysozyme type G (EC 3.2.1.17) |
|  |  | GH24 | lysozyme (EC 3.2.1.17) |
|  |  | GH28 | polygalacturonase (EC 3.2.1.15) |
|  |  | GH3 | beta-glucosidase (EC 3.2.1.21) |
|  |  | GH31 | alpHa-glucosidase (EC 3.2.1.20) |
|  |  | GH32 | invertase (EC 3.2.1.26) |
|  |  | GH33 | sialidase or neuraminidase (EC 3.2.1.18) |
|  |  | GH36 | alpHa-galactosidase (EC 3.2.1.22) |
|  |  | GH37 | alpHa,alpHa-trehalase (EC 3.2.1.28). |
|  |  | GH39 | alpHa-L-iduronidase (EC 3.2.1.76) |
|  |  | GH4 | maltose-6-pHospHate glucosidase (EC 3.2.1.122) |
|  |  | GH42 | beta-galactosidase (EC 3.2.1.23) |
|  |  | GH53 | endo-beta-1,4-galactanase (EC 3.2.1.89). |
|  |  | GH73 | peptidoglycan hydrolase with endo-beta-N-acetylglucosaminidase  specificity (EC 3.2.1.-) |
|  |  | GH77 | amylomaltase or 4-alpHa-glucanotransferase (EC 2.4.1.25) |
|  |  | GH78 | alpHa-L-rhamnosidase (EC 3.2.1.40) |
|  |  | GH8 | chitosanase (EC 3.2.1.132) |
| chr |  | GT19 | lipid-A-disaccharide synthase (EC 2.4.1.182). |
|  |  | GT2 | cellulose synthase (EC 2.4.1.12) |
|  |  | GT20 | alpHa,alpHa-trehalose-pHospHate synthase [UDP-forming] (EC  2.4.1.15) |
|  |  | GT26 | UDP-ManNAcA: beta-N-acetyl mannosaminuronyltransferase (EC  2.4.1.-) |
|  |  | GT28 | 1,2-diacylglycerol 3-beta-galactosyltransferase (EC 2.4.1.46) |
|  |  | GT30 | CMP-beta-KDO: alpHa-3-deoxy-D-manno-octulosonic-acid (KDO)  transferase (EC 2.4.99.-). |
|  | GT | GT35 | glycogen or starch pHospHorylase (EC 2.4.1.1). |
|  |  | GT4 | sucrose synthase (EC 2.4.1.13) |
|  |  | GT5 | UDP-Glc: glycogen glucosyltransferase (EC 2.4.1.11) |
|  |  | GT51 | murein polymerase (EC 2.4.1.129). |
|  |  | GT56 | TDP-Fuc4NAc: lipid II Fuc4NAc transferase (EC 2.4.1.-) |
|  |  | GT73 | CMP-beta-KDO: alpHa-3-deoxy-D-manno-octulosonic-acid (KDO)  transferase (EC 2.4.99.-). |
|  |  | GT83 | undecaprenyl pHospHate-alpHa-L-Ara4N: 4-amino-4-deoxy-beta-L-  arabinosyltransferase (EC 2.4.2.-) |
|  |  | GT9 | lipopolysaccharide N-acetylglucosaminyltransferase (EC 2.4.1.56) |
|  | PL | PL22 | oligogalacturonate lyase / oligogalacturonide lyase (EC 4.2.2.6) |
|  |  | CE10 | arylesterase (EC 3.1.1.-) |
| plasmid | CE | CE1 | acetyl xylan esterase (EC 3.1.1.72) |
|  | CE4 | acetyl xylan esterase (EC 3.1.1.72) |
|  | GH | GH23 | lysozyme type G (EC 3.2.1.17) |
